# Supplementary material
Source: PubMed Central journal article supplement (PMC4397650)
Supplement: NIHMS675483-supplement-Supplementary_data.pdf [file NIHMS675483-supplement-Supplementary_data.pdf]

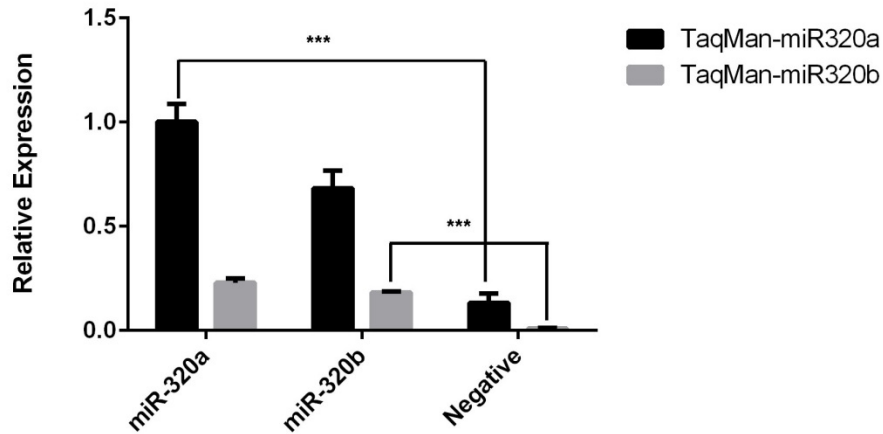

**Supplemental Figure1.** Insufficient specificity of TaqMan assay (Applied Biosystems, Life technologies) in distinguishing microRNA-320b from microRNA-320a by quantitative Real-time PCR. The TaqMan assay with both the TaqMan-miR320a probe and the TaqMan-miR-320b probe showed the significant increase of microRNA-320a and microRNA-320b expression, at 48 hours following microRNA-320a and microRNA-320b mimics transfection, respectively. (\*\*\*)  $p < 0.001$ ). For TaqMan assay RT-qPCR, microRNAs are first specific reverse transcribed by stem-loop specific reverse transcription primers at 3'-terminal, then elongated by one microRNA-specific primer and a second universal primer with TaqMan probe. (TaqMan miR-320a assay ID : 002277, TaqMan miR-320b assay ID : 002844, Applied Biosystems, Life technologies)

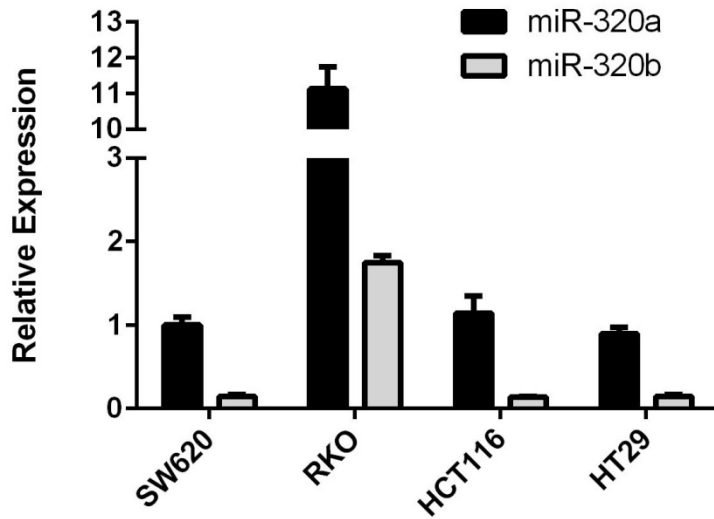

**Supplemental Figure2.** The microRNA-320a and microRNA-320b expression in SW620, RKO, HCT116 and HT29, by quantitative Real-time PCR, using TaqMan assay(Applied Biosystems, Life Technologies). RKO colon cells have high expression level of microRNA-320 whereas SW620 colon cells show low expression of microRNA-320.

|                                    | <b>CRC with<br/>metastasis<br/>(n=20)</b> | <b>CRC without<br/>metastasis<br/>(n=27)</b> | <b>p value</b> |
|------------------------------------|-------------------------------------------|----------------------------------------------|----------------|
| <b>Age (years)</b>                 | 56.6±9.9                                  | 58.7±10.9                                    | 0.5*           |
| <b>Gender (Female)</b>             | 6(30%)                                    | 11(40.7%)                                    | 0.45§          |
| <b>Tumor localization</b>          |                                           |                                              |                |
| Colon                              | 15(75%)                                   | 15(55.6%)                                    | 0.17§          |
| Rectum                             | 5(25%)                                    | 12(44.4%)                                    |                |
| <b>Lymph nodes harvested</b>       | 15±6.5                                    | 15.4±5.6                                     | 0.86*          |
| <b>Tumor differentiation</b>       |                                           |                                              |                |
| Well                               | 2(10%)                                    | 3(11.1%)                                     | 0.37§          |
| Moderately                         | 16(80%)                                   | 17(63.0%)                                    |                |
| Poorly/Undifferentiation           | 2(10%)                                    | 7(25.9%)                                     |                |
| <b>pT classification</b>           |                                           |                                              |                |
| pT1                                | 0(0%)                                     | 0(0%)                                        | 0.09§          |
| pT2                                | 0(0%)                                     | 3(11.1%)                                     |                |
| pT3                                | 18(90%)                                   | 24(88.9%)                                    |                |
| pT4                                | 2(10%)                                    | 0(0%)                                        |                |
| <b>pN classification</b>           |                                           |                                              |                |
| pN0                                | 11(55%)                                   | 17(63.0%)                                    | 0.02§          |
| pN1                                | 4(20%)                                    | 10(37.0%)                                    |                |
| pN2                                | 5(25%)                                    | 0(0%)                                        |                |
| <b>Lymphatic/vascular invasion</b> | 5(25%)                                    | 0(0%)                                        | 0.01 Ø         |
| <b>Perineural invasion</b>         | 4(20%)                                    | 1(3.7%)                                      | 0.15 Ø         |

**Supplemental Table 1.** Basic demographic and clinicopathologic features of CRC patients with or without metastasis. The table showed that there is no statistically significant difference in the basic demographic and clinicopathologic features between the patients with or without metastasis. Data are shown as mean ± standard deviation or *n* (%). \* Student's test. §,  $\chi^2$  test. Ø, Fisher test.

| miRNA                 | Fold change | p-value        |
|-----------------------|-------------|----------------|
| <b>Down-regulated</b> |             |                |
| hsa-miR-15b-5p        | -1.48       | 0.03319        |
| hsa-miR-192-5p        | -2.06       | 0.02678        |
| hsa-miR-196a-5p       | -1.65       | 0.00997        |
| hsa-miR-200b-3p       | -2.10       | 0.00938        |
| hsa-miR-200c-3p       | -1.91       | 0.02077        |
| hsa-miR-20a-5p        | -1.44       | 0.03405        |
| hsa-miR-20b-5p        | -1.47       | 0.01799        |
| hsa-miR-223-3p        | -1.97       | 0.00616        |
| hsa-miR-501-3p        | -1.33       | 0.04455        |
| hsa-miR-95            | -1.84       | 0.01798        |
| <b>Up-regulated</b>   |             |                |
| hcmv-miR-UL70-3p      | 2.52        | 0.00124        |
| hsa-miR-1183          | 2.63        | 0.02259        |
| hsa-miR-1224-5p       | 1.84        | 0.04782        |
| hsa-miR-1308*         | 1.55        | 0.01774        |
| hsa-miR-135b-5p       | 1.71        | 0.01997        |
| hsa-miR-154-5p        | 3.09        | 0.01102        |
| hsa-miR-1826*         | 1.37        | 0.01977        |
| hsa-miR-221-3p        | 1.48        | 0.01011        |
| hsa-miR-296-5p        | 2.17        | 0.02152        |
| hsa-miR-299-5p        | 4.44        | 0.01505        |
| hsa-miR-301b          | 1.80        | 0.01179        |
| <b>hsa-miR-320b</b>   | <b>1.42</b> | <b>0.00355</b> |
| hsa-miR-33b-3p        | 3.57        | 0.04770        |
| hsa-miR-342-5p        | 2.01        | 0.01538        |
| hsa-miR-371a-5p       | 2.28        | 0.01380        |
| hsa-miR-409-3p        | 5.32        | 0.03073        |
| hsa-miR-410           | 3.70        | 0.01658        |
| hsa-miR-486-5p        | 3.59        | 0.00018        |
| hsa-miR-497-5p        | 1.75        | 0.02651        |
| hsa-miR-500a-5p       | 4.04        | 0.03861        |
| hsa-miR-572           | 1.77        | 0.01424        |
| hsa-miR-622           | 1.70        | 0.03515        |
| hsa-miR-630           | 3.57        | 0.03949        |
| hsa-miR-654-3p        | 5.09        | 0.00225        |
| hsa-miR-923*          | 3.06        | 0.00018        |
| hsa-miR-939           | 1.36        | 0.03482        |
| kshv-miR-K12-10b      | 2.94        | 0.03003        |

**Supplemental Table 2.** Dysregulated microRNAs in microRNA microarray. Fold change (Metastasis vs Non-metastasis)  $\geq 1$ , t-test unpaired p-value  $\leq 0.05$ . \* Dead miRNA entry in miRBase(v.21)
